# Supplementary material for: Leveraging Artificial Intelligence to Expedite Antibody Design and Enhance Antibody–Antigen Interactions
Source: Bioengineering (Basel). 2024 Feb 15;11(2):185. doi: 10.3390/bioengineering11020185 (PMC10886287; doi:10.3390/bioengineering11020185)
Supplement: Supplementary file 1 [file bioengineering-11-00185-s001.zip › Ab_modeling_programs.xlsx]

## Sheet: All programs
Year (published)​	Model name​	Paper Title	Goal	Generate/design sequence?	How easy to run	Code sharing	Predict/Generate with what input​ type?	output	Architecture (overall)	Architecture (detail/feature)	DL framework	Metric for prediction evaluation	Data (training)	Data (benchmark1)	Data (benchmark2)	Data sharing (1)	Data sharing (2)	Pros1	Pros2	Pros3	Pros4	Cons​
2023	AbDiffuser	AbDiffuser: Full-Atom Generation of In-Vitro Functioning Antibodies	Generation of Ab 3D structures and sequences	Yes (generates Ab structures and sequences)		No code is shared at least in manuscript.			Diffusion probabilistic model	APMixer (Aligned Protein Mixer)
2023	DeepAIR	DeepAIR: A deep learning framework for effective integration of sequence and 3D structure to enable adaptive immune receptor analysis	Predict binding affinity of BCR (antibody) and antigen.					Binding affinity	Language model (ProtTrans)
2023	DeepBCE	DeepBCE: Evaluation of deep learning models for identification of immunogenic B-cell epitopes	Identify immunogenic B-cell epitopes			No. However, there is http://deeplbcepred.pythonanywhere.com/			CNN
2023	efficient-evolution	Efficient evolution of human antibodies from general protein language models	Affinity maturation	Yes (generates Ab sequences)		https://github.com/brianhie/efficient-evolution			Language model
2023	EvoDiff	Protein generation with evolutionary diffusion: sequence is all you need	Conditional protein sequence generation	Yes (generates Ab sequences)					Discrete denoising diffusion probabilistic models
2023	ImmuneBuilder	ImmuneBuilder: Deep-Learning models for predicting the structures of immune proteins	Predict Ab structure			https://github.com/oxpig/ImmuneBuilder
2023	MITNet	MITNet: a fusion transformer and convolutional neural network architecture approach for T-cell epitope prediction	Predict T-cell epitope						Transformer	CNN		AUC
2023	MLAEP (Machine Learning-guided Antigenic Evolution Prediction)	Predicting the antigenic evolution of SARS-COV-2 with deep learning	Predict the viral fitness landscape and explore antigenic evolution/mutation	Yes (generates Ab sequences)	?	https://github.com/WHan-alter/MLAEP		Sequence	ESM-1b (language model) transformer
2023	NOS (diffusioN Optimized Sampling)	Protein Design with Guided Discrete Diffusion							LaMBO, a Bayesian optimization
2023	ProGen	Large language models generate functional protein sequences across diverse families	Generate diverse Ab sequence						Conditional language modeling
2023	ReprogBERT	Reprogramming Pretrained Language Models for Antibody Sequence Infilling	Generate diverse Ab sequence without losing structural integrity and naturalness	Yes (generates Ab sequences)		https://github.com/IBM/ReprogBERT		Sequence	Language model (BERT)
2023	RESP	The RESP AI model accelerates the identification of tight-binding antibodies	Generate Ab sequence			https://github.com/Wang-lab-UCSD/RESP	Sequence	Sequence	Variational Bayesian Neural Network
2023		Toward generalizable prediction of antibody thermostability using machine learning on sequence and structure features	Predict Ab thermostability			https://github.com/AmeyaHarmalkar/therML	Sequence and structure	Thermostability	Pre-trained language models	CNN			Sequence and structure
2023		Unlocking de novo antibody design with generative artificial intelligence	Generate Ab sequence	Yes (generates Ab sequences)	Code is not shared	Code is not shared	Sequence	Sequence & predicted humanization	N/A													Code is not shared
2022	IgFold	Fast, accurate antibody structure prediction from deep learning on massive set of natural antibodies	Predict Ab structure				Sequence	predicted Ab structure	Pre-trained language model followed by graph networks that directly predict backbone atom coordinates			Orientational coordinate distance, RMSD						Representations from IgFold may be useful as features for machine learning models.
2022	DeepAb	Antibody structure prediction using interpretable deep learning	Predict Ab mutation effect on binding	No (program predicts Fv structure and evaluates Ab mutation effect on binding only)	Easy to run	https://github.com/RosettaCommons/DeepAb	Sequence	structure and predicted affinity	RNN for sequence representation, ResNet to predict 6 distances, angles to predict Fv structure	Used LSTM decoder to calculate negative log likelihood of a particular point mutation given the wild type sequence	pytorch	Orientational coordinate distance, AUC	Observed Antibody Space (OAS) database (e.g. 118,386 paired heavy and light chain sequences)	To test Fv structure prediction, RosettaAntibody benchmark set (47 targets) and Clinical-stage therapeutic antibodies (45 targets) are used.	To test Ab design, deep mutational scanning (DMS) data set for an anti-lysozyme Ab was used.	Structure prediction data is shared at https://zenodo.org/record/5525257	Deep mutational scanning (DMS) data set for an anti-lysozyme Ab should be collected	Provides attention layer to interpretate the features contributing to its predictions.	Most accurate to predict Fv structure among 4 benchmark methods	RNN is chosen instead of transformer for sequence representation for ease of training on the limited data available.	Reports change of categorical cross entropy of designed sequences	Used RNN rather than transformer
2022	BioPhi	BioPhi: A platform for antibody design, humanization, and humanness evaluation based on natural antibody repertoires and deep learning	Humanizes sequence and evaluate humanness of sequence	Semi-yes (it humanizes existing ab seq)	Easy to run	https://github.com/Merck/BioPhi	Sequence	sequence & predicted humanization	Transformer		BioPhi itself does not use ML framework, but its Sapiens uses PyTorch	Accuracy (%), ROC AUC, R2	Observed Antibody Space (OAS) database (collected more than five hundred million human sequences from more than five hundred human subjects)			https://github.com/Merck/BioPhi-2021-publication		open source	Easy to use (by server)			The deviation in performance across sequences is substantial. Different methods were more successful in different cases, further encouraging the assembly of a diverse arsenal of humanization methods.
2022	Binding-ddg-predictor	Deep learning guided optimization of human antibody against SARS-CoV-2 variants with broad neutralization	Redesign the CDR to enhance Ab affinity (targeted multiple virus variants)	Semi-yes (paper mentions it generated an in silico mutation library of CDRs, but it just ranked sequences by trained geometric NN in such a way that they should improve Ab binding to the Sars Cov2 Delta variant RBD)	Easy to run	https://github.com/HeliXonProtein/binding-ddg-predictor	Sequence	predicted binding affinity	Attention-based geometric neural network		pytorch	kD (dissociation constant)	SKEMPI V2.0					Through an iterative optimization procedure, this DL method found that optimized Ab exhibited broader and much more potent neutralizing activity compared to the original Ab.
2022	DiffAb	Antigen-Specific Antibody Design and Optimization with Diffusion-Based Generative Models for Protein Structures	Codesign of sequence and structure of antibody	Yes (it generates sequence and structure)		https://github.com/luost26/diffab		sequence & structure	Diffusion probabilistic model
2022	IG-VAE	IG-VAE: Generative Modeling of Immunoglobulin Proteins by Direct 3D Coordinate Generation	Directly generates 3D coordinate of full-atom Ab bb	Yes (directly generates 3D coordinate of full-atom protein bb)	?	https://github.com/ProteinDesignLab/IgVAE	Known IG structures	Diversififed IG structures	VAE			distance matrix reconstruction and torsion angle inference				shared		intended for use with existing protein design suites such as Rosetta.
2022	iNNterfaceDesign	Deep learning of Protein Sequence Design of Protein-protein Interactions	One-sided design of protein-protein interface	Yes (differs from FastDesign)	Easy to run	https://github.com/strauchlab/iNNterfaceDesign	Both sequence and structure (features of protein receptor)	Redesigned protein interface sequence and structures	LSTM with attention	Convolutional feature extraction	tensorflow in keras	Native sequence recovery rate, hot spot recovery rate	in-house curated DB	in-house curated DB				First neural network model for prediction of amino acid sequences for peptides involved into interchain interactions.	treat the structures of protein as the 3D object to be captured.			One-sided design (rather two-sided)
2022	RefineGNN	Iterative Refinement Graph Neural Network for Antibody Sequence-Structure Co-design	Co-design the sequence and 3D structure of CDRs as graph	Yes (designs both sequence and structure)	?	https://github.com/wengong-jin/RefineGNN	Both sequence and structure	both sequence and structure	Autoregressive/generative graph neural network			perplexity (PPL) of test sequences and the root mean square deviation (RMSD) between a predicted structure and its ground truth structure reported in SAbDab.	SAbDab					co-design the sequence and 3D structure of CDRs as graph
2022	DLAB (Deep learning for antibody)	DLAB: deep learning methods for structure-based virtual screening of antibodies	Screen putative binding Ab against Ag targets of interest	No (it screens putative binding Ab against target Ag)		https://github.com/oxpig/dlab-public	Structure		CNN (Conv3D)		pytorch	fnat (score of docking pose of antibody–antigen pairings)	Antibody structures (modeled with ABodyBuilder and ZDOCK)					Can predict antibody–antigen binding for antigens with no known antibody binders.	useful for early-stage virtual screening of antibody therapeutics, when an epitope target of interest is known but no viable hit antibodies have yet been identified.
2021	Antibody design using LSTM	Antibody design using LSTM based deep generative model from phage display library for affinity maturation	Predict Ab binding affinity	Yes (it generates sequence)	Code is not shared	Code is not shared	Sequence		LSTM (Prioritized the most promising sequences according to their likelihood as calculated by the trained LSTM)			Dissociation constant (Kd)	NGS data			Data not shared		Generated sequences with greater affinity than frequency based screening using the same dataset did				Code and data are not shared
2021	IgLM	Generative Language Modeling for Antibody Design	Generate synthetic Ab libraries															Generate full-length Ab sequences conditioned on chain type and species-of-origin.	Diversify loops on an Ab to generate high-quality synthetic libraries that display biophysical properties consistent with those of natural Ab sequences	Diversify loops displaying lower immunogenicity and more humanness
2021		In silico proof of principle of machine learning-based antibody design at unconstrained scale	Annotate newly generated Ab sequences with Ag-binding binding information	No (this program annotates newly generated Ab sequences with Ag-binding binding information, not generates new sequences)	Not easy (no dataset, tutorial exists)	https://github.com/csi-greifflab/manuscript_insilico_antibody_generation	Sequence (trained exclusively on antibody sequence data, but output is 3D structural data)		RNN-LSTM	leveraged a lattice-based antibody-antigen binding simulation framework, which incorporates a wide range of physiological antibody binding parameters.	tensorflow	Kolgomorov–Smirnov distance (KSD) to quantify the similarity between the generated binding affinity distributions and the native affinity distribution.	large-scale dataset of 70M [3 orders of magnitude larger than the current state of the art] synthetic antibody-antigen complexes,					Novel Ab variants with high affinity and specific epitope binding can be generated based on sufficiently large training data				Used RNN-LSTM rather than transformer (that avoid recurrence and can deal longer sequence)
2021	Absolut!	One billion synthetic 3D-antibody-antigen complexes enable unconstrained machine-learning formalized investigation of antibody specificity prediction	Generate parameter-based unconstrained synthetic lattice-based 3D-Ab-Ag binding structures with ground-truth access to conformational paratope, epitope, and affinity.	Yes (this program generates parameter-based unconstrained synthetic lattice-based 3D-Ab-Ag binding structures with ground-truth access to conformational paratope, epitope, and affinity)	Not easy (requires compile for C++, windows OS)	https://github.com/csi-greifflab/Absolut/	Both sequence and structure	both sequence and structure	GRU	transformer	tensorflow					binding db is shared		Formalized immunological antibody specificity prediction problems as machine learning tasks for which the in silico complexes are immediately usable as benchmark.	Explored machine learning architectures for paratope-epitope interaction prediction accuracy as a function of neural network depth, dataset size, and sequence-structure encoding.
2021	DMS_opt	Optimization of therapeutic antibodies by predicting antigen specificity from antibody sequence via deep learning	Optimize Ab (with respect to binding, viscosity, clearance, solubility and immunogenicity)	Semi-yes (model identifies/screens Ag-binding sequences from an in-silico generated library)		https://github.com/dahjan/DMS_opt	Sequence		LSTM-RNN and CNN		tensorflow	ROC, AUC, PR	Deep-sequenced libraries of the therapeutic antibody (which are screened for specificity to human epidermal growth factor receptor 2)
2021		Protein design and variant prediction using autoregressive generative models	Generate nanobody sequences	Yes (generates nanobody sequences)	Not easy (tf ver 1 can't be installed)	https://github.com/debbiemarkslab/SeqDesign	Sequence		autoregressive/generative	causal CNN	both tensorflow and pytorch versions are available
2021		Sequence-based deep learning antibody design for in silico antibody affinity maturation	Affinity maturation	No (it predicts binding affinities)	Code is not shared	Code is not shared	Sequence		Hag-Net graph neural network	contributions of interacting contacts (ICs), non-interacting surface (NIS), as well as antibody-based features in terms of affinity prediction		AUC	Antibody-Bind (a manually curated and organized database that includes 1101 mutants across 32 complexes, with experimentally determined binding affinities upon mutations			Antibody-Bind (a manually curated and organized database that includes 1101 mutants across 32 complexes, with experimentally determined binding affinities upon mutations		Hag-Net shows higher accuracy and significantly faster and smoother training than LSTM				The proposed method and trained models ought to be validated on larger dataset, and its feasibility in assisting the antibody maturation need to be further evaluated along with industry practice on unseen wildtype samples.
2021	AbsFngP	Using the antibody-antigen binding interface to train image-based deep neural networks for antibody-epitope classification	Classify Ab according to certain characteristics, such as their preference for a given epitope	No (it classifies Ab according to certain characteristics, such as their preference for a given epitope)		https://github.com/dripoll53/AbsFngP/	Sequence		ResNet50	generates a 2-D representation (or fingerprint) of an Ab binding site	Keras	AUC, Classification accuray, precision, recall, F1-score				Shared in supporting information		Use 2-D image recognition to enrich pools of known disease-specific antibodies. In particular, cases where such common functionality cannot be inferred from sequence based analysis.	No explicit sequence or residue-connectivity information is used during training of the DNN models. (sequence information is only used to produce the structural models of the Abs to determine likely distributions of key residues)			Analysis of Ab functions that do not involve the Ab binding site region such as cell signaling that require the Fc region of Abs is out of the scope of the current methodology
2020	Ens-Grad (ensemble gradient ascent)	Antibody complementarity determining region design using high-capacity machine learning	Design CDR (especially H3) of human IgG with target affinities that are superior to candidates derived from phage display panning experiments	Yes (it designs sequences rather than predicting their properties according to their enrichment in phage display panning experiments)	Not easy (following documentation is impossible due to many mismatches)	https://github.com/gifford-lab/antibody-2019	Sequence		CNN	AA sequence as one-hot representation	tensorflow	Pearson r, R2 and MSE	Sequencing data of the phage panning experiment	Not really (other held-out data)		Shared (NIH's SRA: accession number SRP158510)		Molecular structure of an antigen does not need to be known, permitting this method to be applied to any target used in affinity selections.	Sequencing data of the phage panning experiment are deposited at NIH’s Sequence Read Archive (SRA) under the accession number SRP158510.			Amino acid sequence as one-hot representation (Transformers (and most other NLP neural models) use embeddings, not one-hot encoding.)
2020	TopNetTree	A topology-based network tree for the prediction of protein–protein binding affinity changes following mutation	Predict ddG of Ab-Ag binding	No (model calculates the binding affinity change upon mutation)		https://codeocean.com/capsule/2202829/tree/v1	Structure		CNN-assisted gradient-boosting tree	topology-based feature generation	Keras	R of ddG of Ab-Ag binding	Ab-Bind			https://codeocean.com/capsule/2202829/tree/v1		original 3D point-cloud data are characterized by topological barcodes	Found out that general PPI prediction and Ab-Ag prediction are different (although similar)
2020		Designing Feature-Controlled Humanoid Antibody Discovery Libraries Using Generative Adversarial Networks	Design monoclonal Ab which retains typical human repertoire characteristics such as diversity, immunogenicity, while raising the possibility of biasing the libraries in silico to achieve other desirable biotherapeutic features.	Yes (in silico design of monoclonal Ab which retains typical human repertoire characteristics such as diversity, immunogenicity, while raising the possibility of biasing the libraries in silico to achieve other desirable biotherapeutic features)	Code is not shared	Code is not shared	Sequence		Wasserstein-GAN (WGAN) (with gradient penalty)		Keras and tensorflow	KLD to quantify divergence, MHCII binding score to quantify the immunogenicity risk in a sequence based on whether its constituent peptides are predicted to bind strongly and promiscuously to MHCII proteins	Observed Antibody Space (OAS) repository					provides through transfer learning (continued training of a model with a subset of data with specific desirable characteristics), an inherent method to bias the physical properties of the generated antibodies toward improved developability and chemical and biophysical properties.	explore the human antibody space in a rational way (no longer need to rely on previously-discovered antibodies and their nearby variants, which provide a very small random sampling of the true antibody space)			More research will be needed to determine precisely which antibody sequence, structure, or biophysical features will bias antibody libraries for developability, quality, and efficacy, as there are many nonlinear pathways for antibody optimization
2020		Modern Hopfield Networks and Attention for Immune Repertoire Classification	Classify the immune status based on the immune repertoire sequences	No (it classifies the immune status based on the immune repertoire sequences)		https://github.com/ml-jku/DeepRC	Sequence		CNN and LSTM sequence embedding	transformer-like attention, or equivalently modern Hopfield networks	pytorch	ROC-AUC						outperforms all other methods with respect to predictive performance on large-scale experiments, including simulated and real-world virus infection data	enables the extraction of sequence motifs that are connected to a given disease class.
2020		Convergent selection in antibody repertoires is revealed by deep learning	Model B cell receptor (BCR) recombination	Yes (it generates Ab sequence)	Code is not shared	Code is not shared	Sequence		VAE		tensorflow		used deep sequencing to analyse the antibody repertoires in the bone 4 marrow of 45 BALB/c mice					trained encoding neural network is able to identify motifs in unseen repertoires in a sensible manner, thereby extending currently existing frameworks for immunodiagnostics
2019		Antibody Specific B-Cell Epitope Predictions: Leveraging Information From Antibody-Antigen Protein Complexes	Predict Ab Specific B-Cell Epitope	No (it predicts Ab Specific B-Cell Epitope)	Code is not shared	Code is not shared	Structure (several geometric and physicochemical features that are correlated in interacting paratopes and epitopes)		Feed Forward Neural Networks		Keras											Code is not shared
2019	Vampire	Deep generative models for T cell receptor protein sequences	Model probability distributions on TCR b chain protein sequences.	Not seq generation (this is generative method using VAE, but cohort clustering rather than sequence generation)		https://github.com/matsengrp/vampire/	Sequence		Beta-VAE without direct ELBO		Keras	r2 (about sequence frequency probability comparison)	TCR b chain protein sequences.			https://clients.adaptivebiotech.com/immuneaccess		generalize well to unseen sequences	estimate cohort frequency	learn the rules of VDJ recombination		neural network models are not directly interpretable.
2019		Quantifying the nativeness of antibody sequences using long short-term memory networks	Distinguish natural human Ab sequences from those originating from other species	Not seq generation (it distinguishes natural human Ab sequences from those originating from other species)		https://github.com/vkola-lab/peds2019	Sequence		LSTM		pytorch	ROC curve	pre-processed Ab repertoire NGS datasets in the Observed Antibody Space database					AUC values are high (~0.98)
2017	DRREP (deep ridge regressed epitope predictor)​	DRREP: deep ridge regressed epitope predictor	Classify epitope	No (it classifies epitope)		https://github.com/CorticalComputer/DRREP	Sequence		CNN	k-mer of sequence, then convolution		AUC		5 benchmark datasets (SARS, HIV, SEQ194, AntiJen, Pellequer)				Best accuracy among 3~9 tested models (2022 benchmark)
2006		Prediction of continuous B-cell epitopes in an antigen using recurrent neural network	Predict linear/continuous B-cell epitopes in an Ag seq	No (it predicts linear/continuous B-cell epitopes in an Ag seq)			Sequence		standard feed-forward and recurrent neural network									The first neural network model used for predicting linear B-cell epitope
